# Supplementary material for: Adoption of a Blended Training Curriculum for ACT in New York State
Source: Atypon-hosted journal article supplement (doi:10.1176/appi.ps.201600143), 2016-05-16

**Training uptake activity by individuals and teams**

| <b>Training Activity</b>                       | <b>% Individuals with Completed Training<br/>N=767</b> | <b>% Teams with Completed Training<br/>N=81</b> |
|------------------------------------------------|--------------------------------------------------------|-------------------------------------------------|
| <b><i>Face-to-Face Training Activities</i></b> |                                                        |                                                 |
| ACT Core Principles                            | 87.0%                                                  | 30.9%                                           |
| Person Centered Treatment Planning             | 85.0%                                                  | 27.2%                                           |
| <b><i>On-line Training Modules</i></b>         |                                                        |                                                 |
| Person-Centered Treatment Planning             | 85.9%                                                  | 38.3%                                           |
| Promoting Recovery                             | 94.8%                                                  | 62.9%                                           |
| Engaging Consumers                             | 93.1%                                                  | 56.8%                                           |
| Stage-wise Treatment On-line Module            | 89.4%                                                  | 50.6%                                           |
| Motivational Interviewing                      | 90.9%                                                  | 53.1%                                           |
| Cognitive Behavior Therapy                     | 89.8%                                                  | 53.1%                                           |
| <b>Fully Trained</b>                           | <b>73.7%</b>                                           | <b>16.0%</b>                                    |

# Cumulative Number of Modules Completed by ACT Staff

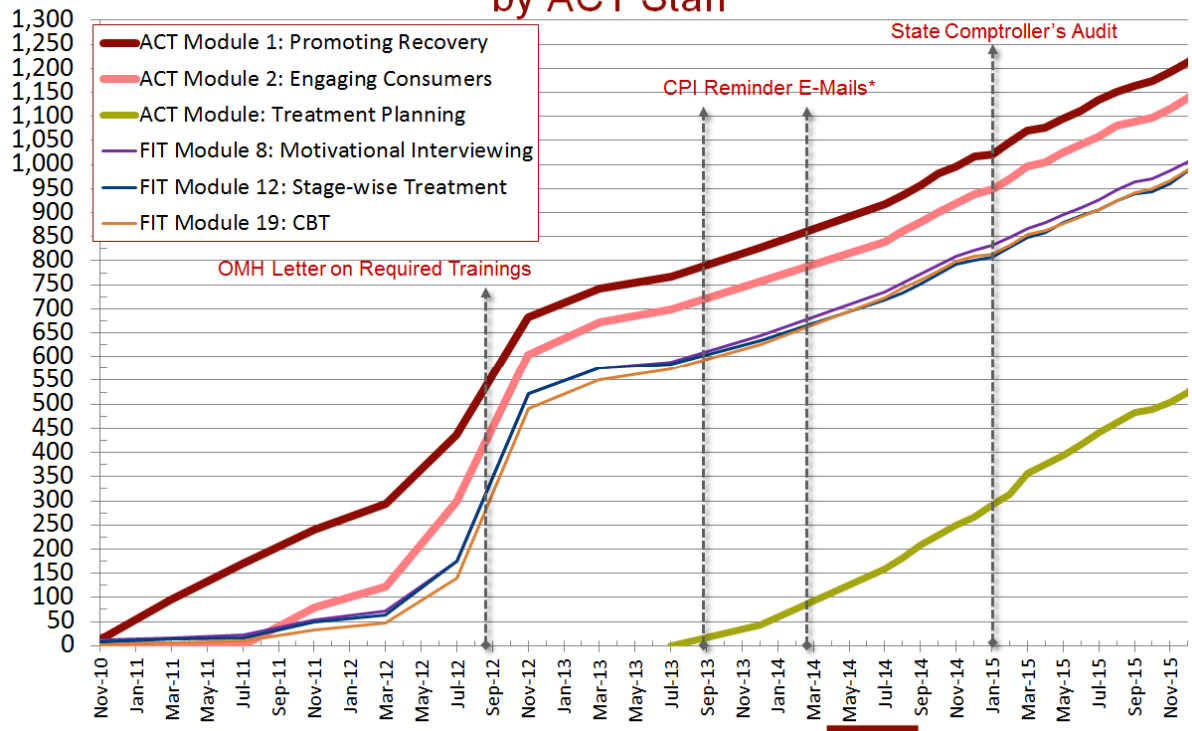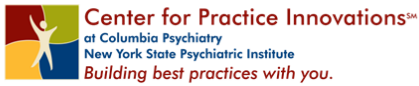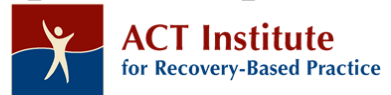

Supplement: appi.ps.201600143.ds001.pdf [file appi.ps.201600143.ds001.pdf]
